# Supplementary material for: Racial/ethnic Disparities on Inflammation and Response to Methylprednisolone in Severe Covid-19 Pneumonia
Source: Research Square preprint supplement (doi:10.21203/rs.3.rs-1005533/v1), 2021-10-27
Supplement: Supplementary file 1 [file bd884cc04efa68c3e9461dc2.docx]

**SUPPLEMENTAL SECTION FOR RACIAL/ETHNIC DISPARITIES ON INFLAMMATION AND RESPONSE TO METHYLPREDNISOLONE IN SEVERE COVID-19 PNEUMONIA**

Ronaldo C. Go, Themba Nyirenda, Maryam Bojarian, Davood Karimi Hosseini, Kevin Kim, Mehek Rahim, Elli Gourna Paleoudis, Anna C. Go, Zhihong Han, Steven Sperber, Anjali Gupta

**Table of Contents**

**Figure S1:** Kaplan Meier Plot of In Hospital Survival of Whites versus Hispanics Who Received No Methylprednisolone…………………………………………-………………………………..3

**Figure S2:** Kaplan Meier Plot of In Hospital Survival of Whites versus Hispanics Who Received Low Dose Methylprednisolone…..………………………………………………………………..4

**Figure S3:** Kaplan Meier Plot of In Hospital Survival of Whites versus Hispanics Who Received High Dose Methylprednisolone…………………………………………………….……………..5

**Figure S1.** Kaplan Meier Plot of In Hospital Survival Between Whites versus Hispanics who received no methylprednisolone (NMP).

**Figure S2.** Kaplan Meier Plot of In Hospital Survival Between Whites versus Hispanics who received low dose methylprednisolone (LDMP).

**Figure S3.** Kaplan Meier Plot of In Hospital Survival Between Whites versus Hispanics who received high dose methylprednisolone (HDMP).
